# Supplementary material for: A mixed-methods approach to assessing implementers’ readiness to adopt digital health interventions (RADHI)
Source: Springer Nature journal article supplement (doi:10.1186/s43058-024-00628-2), 2024-08-27
Supplement: MOESM1 [file 43058_2024_628_MOESM1_ESM.docx]

**Additional File 1 – RADHI Psychometric Results**

The Readiness to Adopt Digital Health Interventions (RADHI) scale was created to assess community-based organization (CBO) staff’s perceptions of whether their organization is prepared to consider incorporating a digital health intervention into its programs.

**Conceptual development**

We examined the literature for measures of eHealth/mHealth readiness. We found no existing quantitative assessments of readiness specific to client-facing behavioral intervention technologies; however, Khatun and colleagues (1) proposed a conceptual model for mHealth readiness that was expanded upon in subsequent research (2, 3). We selected key concepts from these frameworks that would be unique to digital interventions (i.e., not overlapping with measures of general organizational readiness) and drafted an initial set of nine items rated on a 5-point scale from 0 (*not at all*) to 4 (*to a very great extent*):

| Concept | Item | Factor loadings | |
| --- | --- | --- | --- |
| EFA | CFA |
| eHealth implementation self-efficacy | 1. Our organization is ready to implement an eHealth intervention. | 0.693 | 0.735 |
| Familiarity with eHealth | 1. Our organization has experience with implementing eHealth interventions. | 0.710 | 0.718 |
| Familiarity with eHealth | 1. eHealth interventions differ from the services our organization typically provides. | 0.340 | -- |
| Willingness to use eHealth | 1. Our organization plans to use other eHealth interventions in the future if they are available. | 0.757 | 0.824 |
| Proficiency in using digital technologies | 1. Our organization adopts new technology and computer systems easily. | 0.687 | 0.638 |
| Trust in technology | 1. eHealth interventions can be as effective as in-person/face-to-face interventions | 0.598 | 0.582 |
| Trust in technology | 1. I worry about the types of information being collected by eHealth interventions. | 0.089 | -- |
| Personal technology adoption/ proficiency in using digital technologies | 1. I adopt technological innovations quickly. | 0.716 | -- |
| Personal technology adoption/ proficiency in using digital technologies | 1. I am comfortable troubleshooting minor technological problems on my own. | 0.423 | -- |

**Factor analysis**

In an initial exploratory factor analysis with Varimax rotation, examination of the scree plot and factor loadings (see above) indicated that a one-factor solution best fit the data. We removed Items 3, 7, and 9 because of poor fit and then Item 8 for conceptual reasons, as it was the only individual-focused item remaining. Confirmatory factor analysis of the final five items demonstrated acceptable factor loadings and model fit (RMSEA = .07, CFI = .985, TLI = .971, SRMS = .033) as well as good internal consistency (alpha = .825).

**Validation**

To assess scale validity, we compared the RADHI scores of 85 staff in 22 CBOs to the following multilevel variables that we thought could be theoretically related to readiness to adopt digital interventions:

- Individual staff’s ratings of their organization’s general readiness to implement change, measured using the Organizational Change Recipients’ Belief Scale (OCRBS). (concurrent validity)
- Individual staff’s acceptability of Keep It Up! (KIU!) after going through the intervention themselves, measured using the Intervention Acceptability and Tolerability (IAT) scale. (concurrent validity)
- Merit scores assigned to each CBO by reviewers of the CBOs’ original proposals for funding to deliver Keet It Up! (concurrent validity)
- The number of days at each CBO between the completion of staff training on KIU! and the date of first participant enrollment. (predictive validity)
- The number of participants enrolled by each CBO within the first three months of enrollment. (predictive validity)
- The number of hours of technical assistance from the research team requested by each CBO over the two-year period of KIU! implementation. (predictive validity)

We regressed individual RADHI scores on individual OCRBS and IAT scores using linear regression and found that readiness to adopt digital interventions was significantly associated with general organizational readiness (ß = 0.38, *p* < .001) but not intervention acceptability (*p* = .124). We conducted multilevel regressions of staff nested within CBOs for organization-level variables. RADHI was significantly positively associated with the number of enrollees in the first three months (ß = 0.12, *p* = .001) and marginally negatively associated with the number of requested technical assistance hours (ß = −0.12, *p* = .092), demonstrating ; we found no association between RADHI and neither CBO proposal score (*p* = .263) nor time to first enrollment (*p*= .504). In summary, the RADHI scale demonstrated some concurrent and predictive validity to other variables among our sample of CBOs. Although more research on the scale is warranted, our findings suggest it is a valid and reliable measure for other researchers examining organizations looking to adopt digital health interventions.

**Resources**

1. Khatun F HA, Ray PK, Hanifi SMA, Bhuiya A, Liaw S-T. Determinants of readiness to adopt mHealth in a rural community of Bangladesh. International Journal of Medical Informatics. 2015;84(10):847-56.

2. Khatun F HA, Ray PK, Bhuiya A, Liaw S-T. Community Readiness for Adopting mHealth in Rural Bangladesh: A Qualitative Exploration. International Journal of Medical Informatics. 2016;93:49-56.

3. Weichelt B. Health in Your Hand: Assessment of Clinicians’ Readiness to Adopt Mhealth into Rural Patient Care. Theses and Dissertations2016.
